# Supplementary material for: Identification of New Therapeutic Targets by Genome-Wide Analysis of Gene Expression in the Ipsilateral Cortex of Aged Rats after Stroke
Source: PLoS One. 2012 Dec 12;7(12):e50985. doi: 10.1371/journal.pone.0050985 (PMC3521001; doi:10.1371/journal.pone.0050985)
Supplement: Table S5 — Immune and inflammatory response-related genes verified by RT-PCR. (XLSX) [file pone.0050985.s005.xlsx]

## Sheet: list for paper
Table S5. Immune and inflammatory response-related genes verified by RT-PCR
Sequence Code	Gene Symbol	Gene name	Young 3d		Young 14d		EP	Aged 3d		Aged 14d		EP
			fold change	SD	fold change	SD		fold change	SD	fold change	SD
10843697	Card9	caspase recruitment domain family, member 9	8.06	4.28656	5.61493	0.774897	A	3.2	0.0828257	7.29313	0.713752	A
10736697	Ccl2*	chemokine (C-C motif) ligand 2	52.37	5.94	5.49	1.92685	A	25.89	12.1742	8.29	2.13825	A
10853240	Cd36*	CD36 molecule (thrombospondin receptor)	11.84	0.59	1.81	1.02	B	17.77	2.13	9.85	3.9	A
10842283	Cd40*	CD40, TNF receptor superfamily member 5	3.03	0.08	4.35	0.06	A	3.18	0.12	3.73	0.04	A
10856274	Cd8a*	CD8 antigen, alpha chain	87.3549	9.08588	25.7994	2.02185	A	52.3249	1.3542	65.1882	8.66921	A
10706131	Cebpa	CCAAT/enhancer binding protein alpha	-1.22	0.0313025	1.66	0.986889	NC	2.48	0.0961664	3.91	0.374215	A
10940529	Cebpd	CCAAT/enhancer binding protein delta	5.34475	0.588257	5.76145	0.057607	A	8.71191	0.856766	6.02542	0.188139	A
10900735	Cfd	complement factor D (adipsin)	2.19	1.34	2.76	0.5	A	3.84	0.69	8.53	2.32	A
10809037	Cklf1	chemokine-like factor	8.56716	0.488117	6.88887	0.890073	A	5.97701	0.490168	3.8813	0.239802	A
10763808	Ctse	cathepsin E	2.39	0.08	2.55	0.23	A	2.43	0.01	3.68	0.33	A
10843424	Dpp7	dipeptidylpeptidase 7	3.03	0.08	4.35	0.06	A	3.27	0.02	3.48	0.08	A
10824530	Il6r	interleukin 6 receptor	1.9	0.148591	7.75	0.39	C	4.91	0.659298	3.55	0.515011	A
10828026	Lst1	leukocyte specific transcript 1	4.4	0.1	1.15	0.1	B	2.18	0.1	1.96	0.0865806	B
10715787	Nfkb2	nuclear factor of kappa light, p49/p100	1.15	0.01	2.62	0.01	C	2.26	0.01	2.38	0.01	A
10753222	Runx1	runt related transcription factor 1	4.34	0.21	3	0.17	A	3.15	0.44	2.63	0.2	A
10862415	Tmem176b	transmembrane protein 176B	1.97	0.250167	4.1	0.12828	A	3.36	0.20247	4.23	0.392989	A
10740869	Tnfrsf12a	tumor necrosis factor receptor superfamily, member 12a	2.75	0.09	1.27	0.1	B	2.93	0.09	1.4	0.56	B
10858967	Tnfrsf1a**	tumor necrosis factor receptor superfamily, member 1a	3.23	0.02	4.33	0.04	A	3.78	0.17	5.29	0.07	A
10881424	Tnfrsf1b**	tumor necrosis factor receptor superfamily, member 1b	4.69	0.25	11.16	0.2	A	7.41	0.14	8.28	0.1	A
10712720	Unc93b1	unc-93 homolog B1	6.77	0.07	11.71	0.01	A	4.63	0.01	13.55	0.02	A
10931196	Vav1	vav 1 oncogene	9.13	0.12	12.91	2.69	A	8.94	0.36	7.57	0.46	A
10863218	Vamp8	vesicle-associated membrane protein 8	2.46	0.278833	3.77	0.800446	A	4.94	0.0885572	5.48	0.167691	A
10846201	Wipf1	WAS/WASL interacting protein family, member 1	5.66	0.11	11.63	0.16	A	18.51	0.04	9.58	0.17	A
Legend
*confirmatory results, age effect
** confirmatory results, no age effects
	age-related expression
Abbreviations: SD, standard deviation; EP, expression pattern; NC, no change
