# Supplementary material for: Identification of New Therapeutic Targets by Genome-Wide Analysis of Gene Expression in the Ipsilateral Cortex of Aged Rats after Stroke
Source: PLoS One. 2012 Dec 12;7(12):e50985. doi: 10.1371/journal.pone.0050985 (PMC3521001; doi:10.1371/journal.pone.0050985)
Supplement: Table S9 — Neurogenesis & synaptic plasticity-related genes verified by RT-PCR. (XLSX) [file pone.0050985.s009.xlsx]

## Sheet: Tabelle1
Table S9. Neurogenesis & synaptic plasticity-related genes
Sequence Code	Gene Symbol	Gene name	Young 3d		Young 14d		EP	Aged 3d		Aged 14d		EP
			fold change	SD	fold change	SD		fold change	SD	fold change	SD
10736585	Adap2	ArfGAP with dual PH domains 2	2.41	0.08	1.78	0.3	B	2.33	0.29	3.58	0.12	A
10904511	Arc	activity-regulated cytoskeleton-associated protein	-4.04139	0.0251747	-3.07307	0.179476	F	-1.05235	0.0640403	-3.60839	0.0376099	D
10752135	Camk2n2	calcium/calmodulin-dependent protein kinase II inhibitor 2	-4.33	0.0133861	-1.44281	0.00512584	E	-3.04	0.011773	-1.41	0.0221778	E
10857512	Cntn4	contactin 4	-1.59	0.0125231	-2.72	0.0172029	D	-1.42	0.0912146	-1.16	0.0189098	NC
10780813	Fgf9	fibroblast growth factor 9	-1.15	0.02	-1.61	0.08	NC	-1.27	0.08	-2.1	0.04	D
10846685	Neurod1	neurogenic differentiation 1	-2.23768	0.0462154	-1.03839	0.0207889	E	-2.18	0.0963045	-2.91	0.18	F
10746896	Neurod2	neurogenic differentiation 2	-1.12	0.0579949	-1.55	0.0947241	NC	-2.11	0.0376106	-1.68	0.0689091	E
10899387	Nr4a1	nuclear receptor subfamily 4, group A, member 1	-3.90829	0.0317205	-1.12664	0.0420687	E	-2.65803	0.0415308	-2.09	0.0613853	F
10845384	Nr4a2	nuclear receptor subfamily 4, group A, member 2	-3.29918	0.0291091	1.08149	0.065302	E	-1.42246	0.277631	-1.50886	0.14682	NC
10826148	Ntng1	netrin G1	-2.06232	0.0116045	-2.32	0.0527109	F	-1.17943	0.0644812	-1.03	0.0187247	NC
10773945	Rasl10b	RAS-like, family 10, member B	-1.34	0.25	-1.05	0.05	NC	-1.4	0.01	-2.78	0.12	D
10712239	Rassf7	Ras association domain family, member 7	-1.49	0.53	-1.69	0.01	NC	-2.1	0.03	-2.2	0.06	F
10830908	Rnf39	ring finger protein 39	-1.56	0.0577206	-2.7	0.0354694	D	-2.78	0.021049	-2.42111	0.0184091	F
10804415	Sema6a	semaphorin 6A	1.98	0.109713	2.27	0.180986	A	1.94253	0.0469559	2.09	0.0236773	A
10925600	Sept2	septin 2	2.27	0.378869	2.30953	0.219043	A	2.47	0.27308	2.83472	0.233365	A
10798794	Svil	supervillin	2.63	0.2	2.24	0.13	A	2.43	0	1.28	0.09	B
10797726	Tpm3	tropomyosin 3, gamma	-1.5	0.125698	-1.5	0.118459	NC	-1.35	0.101645	-4.13	0.14605	D
10890463	Trim9	tripartite motif-containing 9	-3.14	0.12	-1.01	0.04	E	-1.11	0.01	-3.05	0.09	D
10858858	Vamp1	vesicle-associated membrane protein 1	-1.72	0.01	-2.04	0.08	D	-1.37	0.07	-2.38	0.03	D
Legend
*confirmatory results, age effect
** confirmatory results, no age effects
	age-related expression
Abbreviations: SD, standard deviation; EP, expression pattern; NC, no change
